# Supplementary material for: BODIPY-conjugated bis-terpyridine Ru(ii) complexes showing ultra-long luminescence lifetimes and applications to triplet–triplet annihilation upconversion
Source: Royal Society of Chemistry journal article supplement (doi:10.1039/d2dt01373h), 2022-01-01
Supplement: d2dt01373h1.pdf [file d2dt01373h1.pdf]

## Supporting Information

# **BODIPY-Conjugated Bis-terpyridine Ru(II) Complexes Showing Ultra-long Luminescent Lifetimes and Applying to Triplet-triplet Annihilation Upconversion**

Xingke Yu,<sup>†, a</sup> Fanrui Gao,<sup>†, a</sup> Weiyi Zhao,<sup>b</sup> Hongxia Lai,<sup>a</sup> Lingling Wei,<sup>a</sup> Cheng Yang<sup>\*a</sup> and Wanhua Wu<sup>\*a</sup>

<sup>a</sup> *Key Laboratory of Green Chemistry & Technology of Ministry of Education, College of Chemistry, Sichuan University, Chengdu 610064, China*

<sup>b</sup> *Sichuan University-Pittsburgh Institute, Sichuan University, Chengdu 610064, China*

<sup>†</sup> *X. Yu and F. Gao contributed equally to this work.*

## Table of Contents

|                                     |     |
|-------------------------------------|-----|
| 1.0 Synthesis and characterizations | S2  |
| 2.0 NMR and MS spectra              | S3  |
| 3.0 Photophysical details           | S10 |
| 4.0 Upconversion details            | S12 |

## 1.0 Synthesis and characterizations

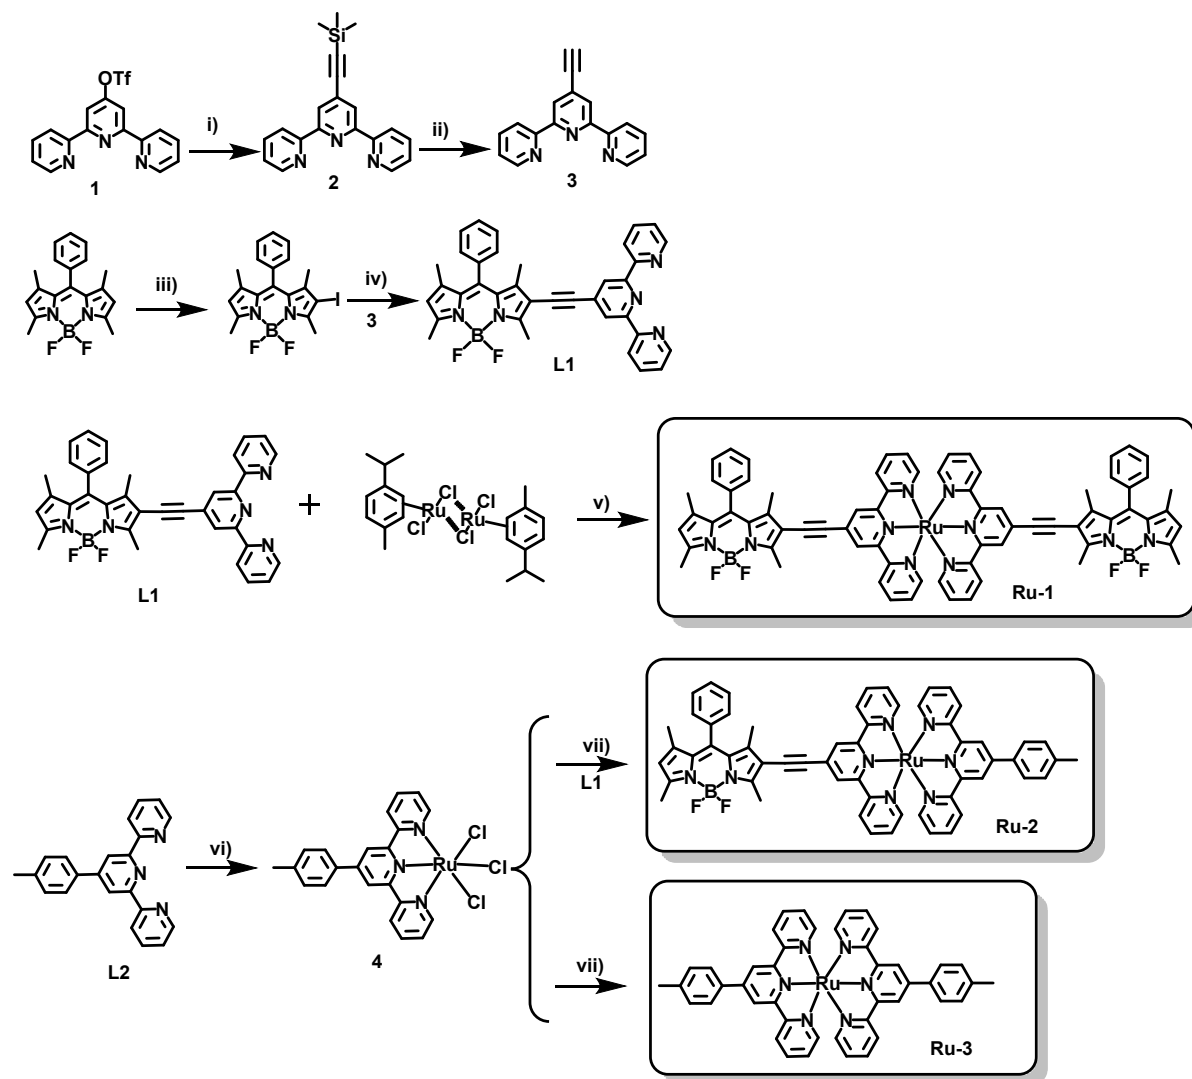

**Scheme S1.** The synthetic route of **Ru-1**, **Ru-2** and **Ru-3**. Reagents and conditions: (i) Pd (PPh<sub>3</sub>)<sub>2</sub>Cl<sub>2</sub>, PPh<sub>3</sub>, CuI, triethylamine/THF, 70°C, 4 h; (ii) KF, MeOH/THF, RT, overnight; (iii) NIS, CH<sub>2</sub>Cl<sub>2</sub>, RT, 30min; (iv) Pd (PPh<sub>3</sub>)<sub>2</sub>Cl<sub>2</sub>, PPh<sub>3</sub>, CuI, Triethylamine/THF, 70°C, overnight, N<sub>2</sub>; (v) ethanol, 90°C, 48h, N<sub>2</sub>; (vi) RuCl<sub>3</sub>; ethanol, 90°C, 2h, N<sub>2</sub>; (vii) 4-Ethylmorpholine, ethanol, 90°C, 48h, N<sub>2</sub>.

## 2.0 NMR and MS spectra

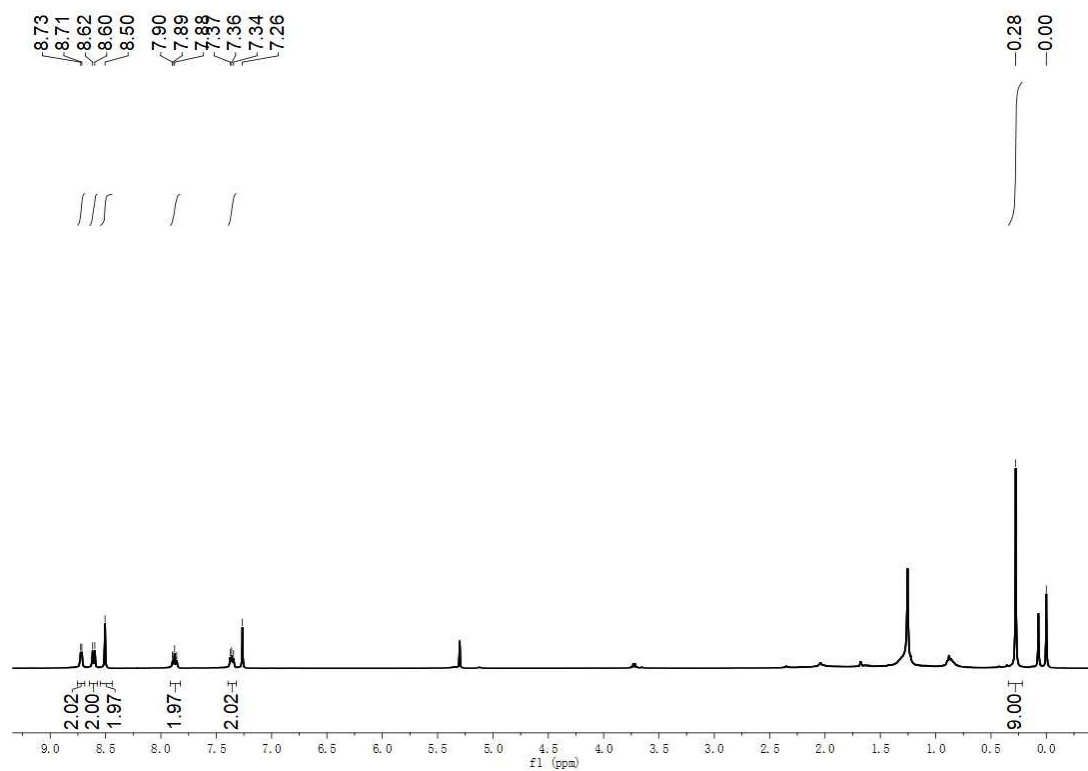

Figure S2.  $^1\text{H}$  NMR for **2** in  $\text{CDCl}_3$ ,  $20^\circ\text{C}$ .

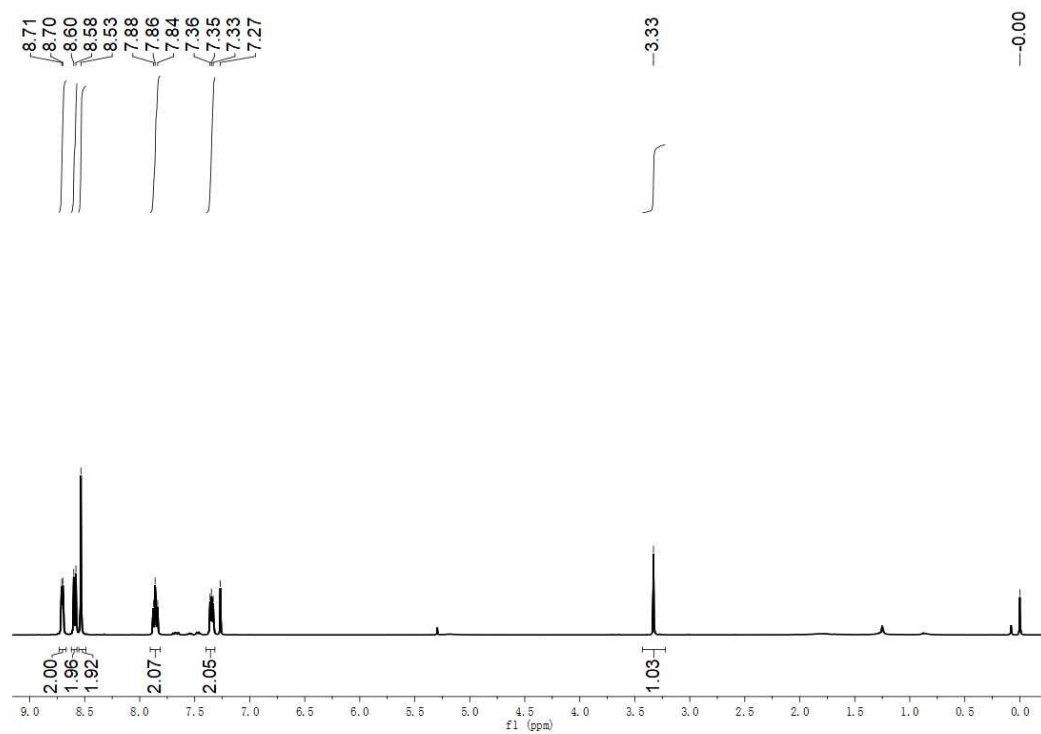

Figure S3.  $^1\text{H}$  NMR for **3** in  $\text{CDCl}_3$ ,  $20^\circ\text{C}$ .

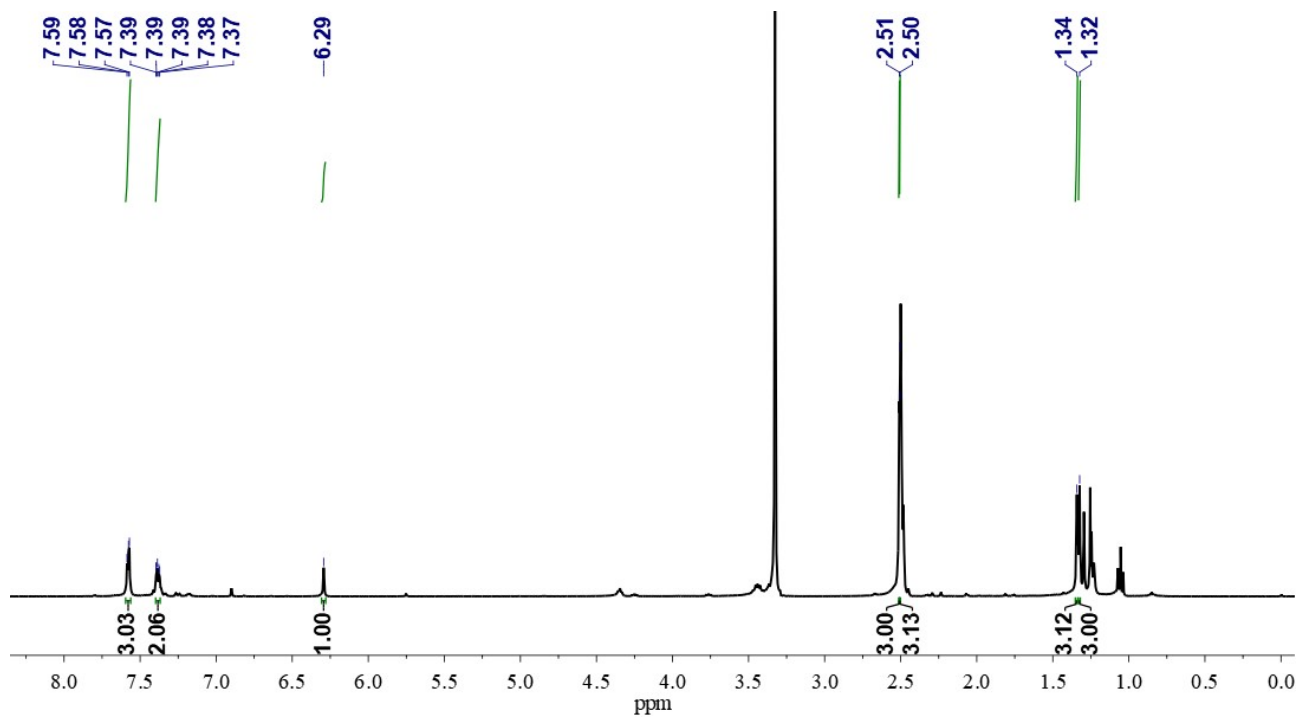

Figure S4.  $^1\text{H}$  NMR for **Iodo-Bodipy** in  $\text{CD}_3\text{OD}$ ,  $20^\circ\text{C}$ .

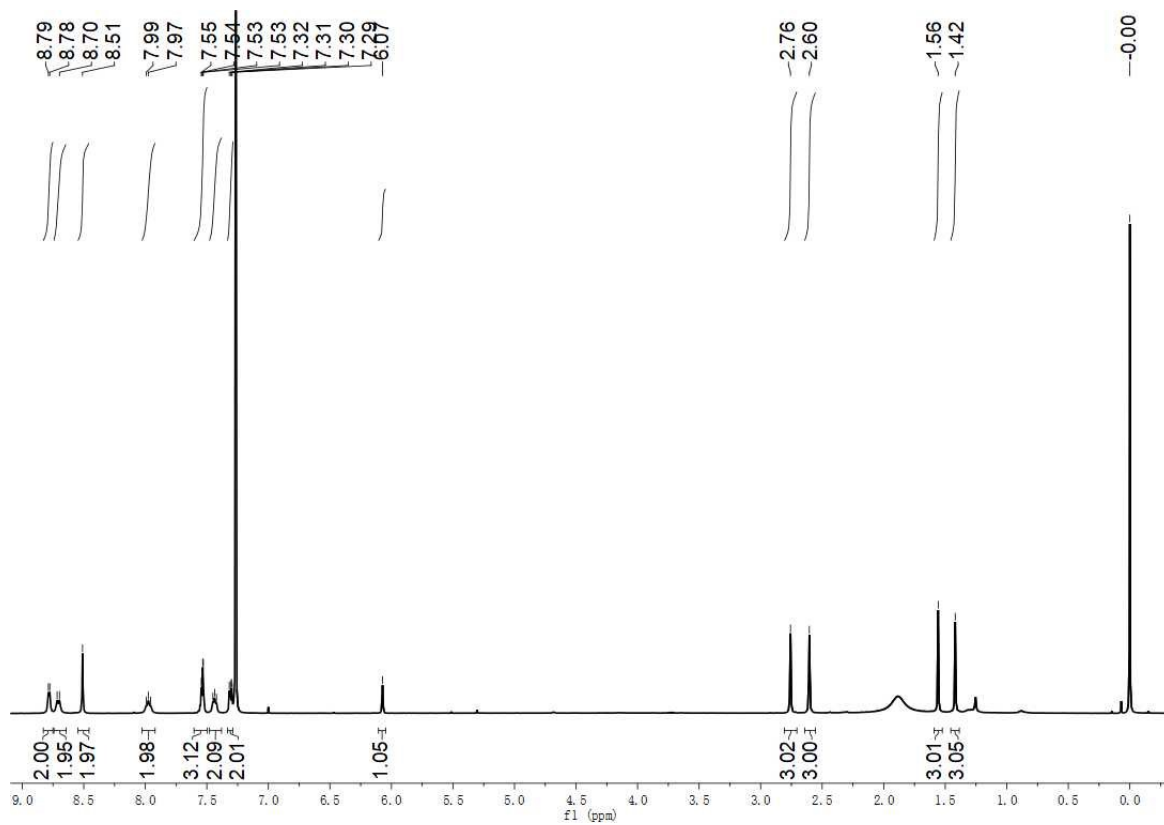

Figure S5.  $^1\text{H}$  NMR for **L1** in  $\text{CDCl}_3$ ,  $20^\circ\text{C}$ .

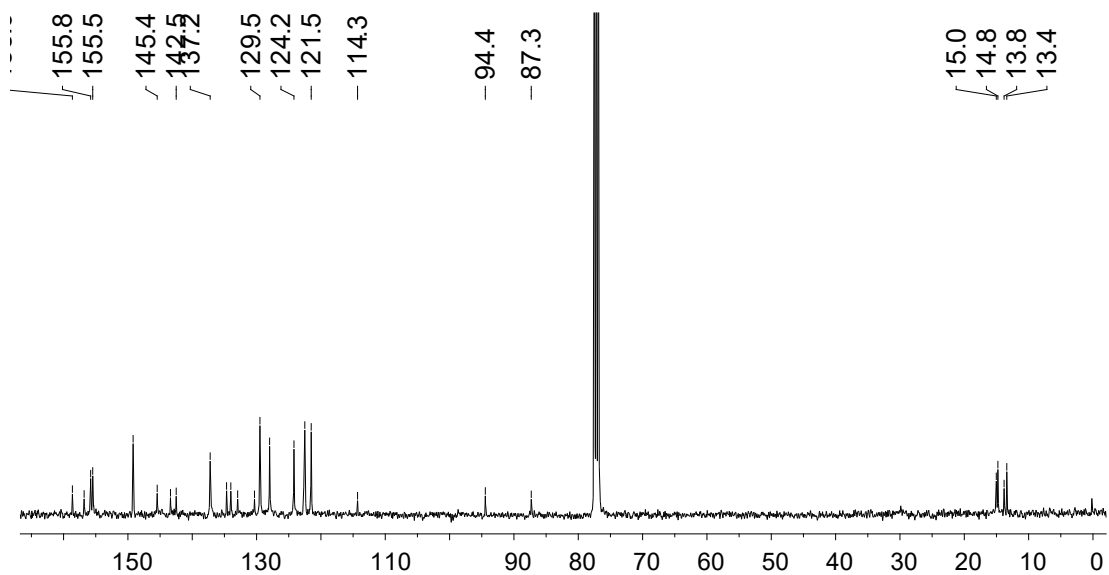

Figure S6.  $^{13}\text{C}$  NMR for **L1** in  $\text{CDCl}_3$ , 20°C.

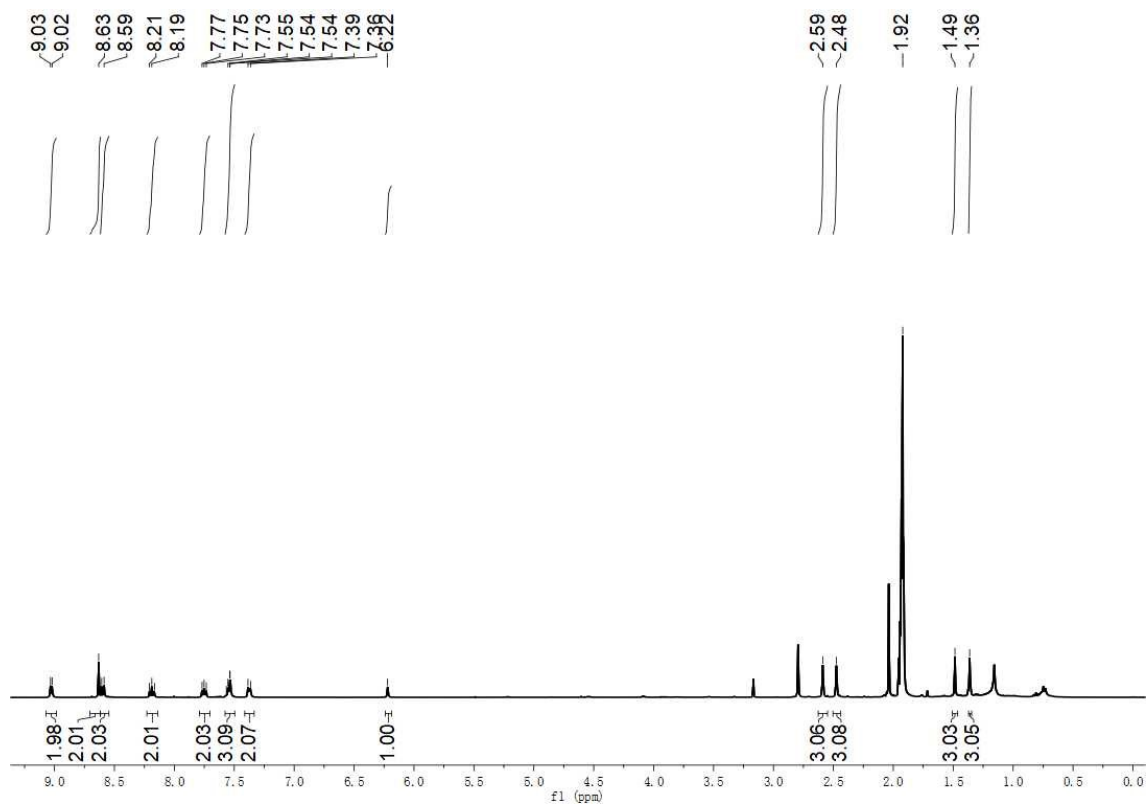

Figure S7.  $^1\text{H}$  NMR for **Ru-1** in  $\text{acetone-}d_6$ , 20°C.

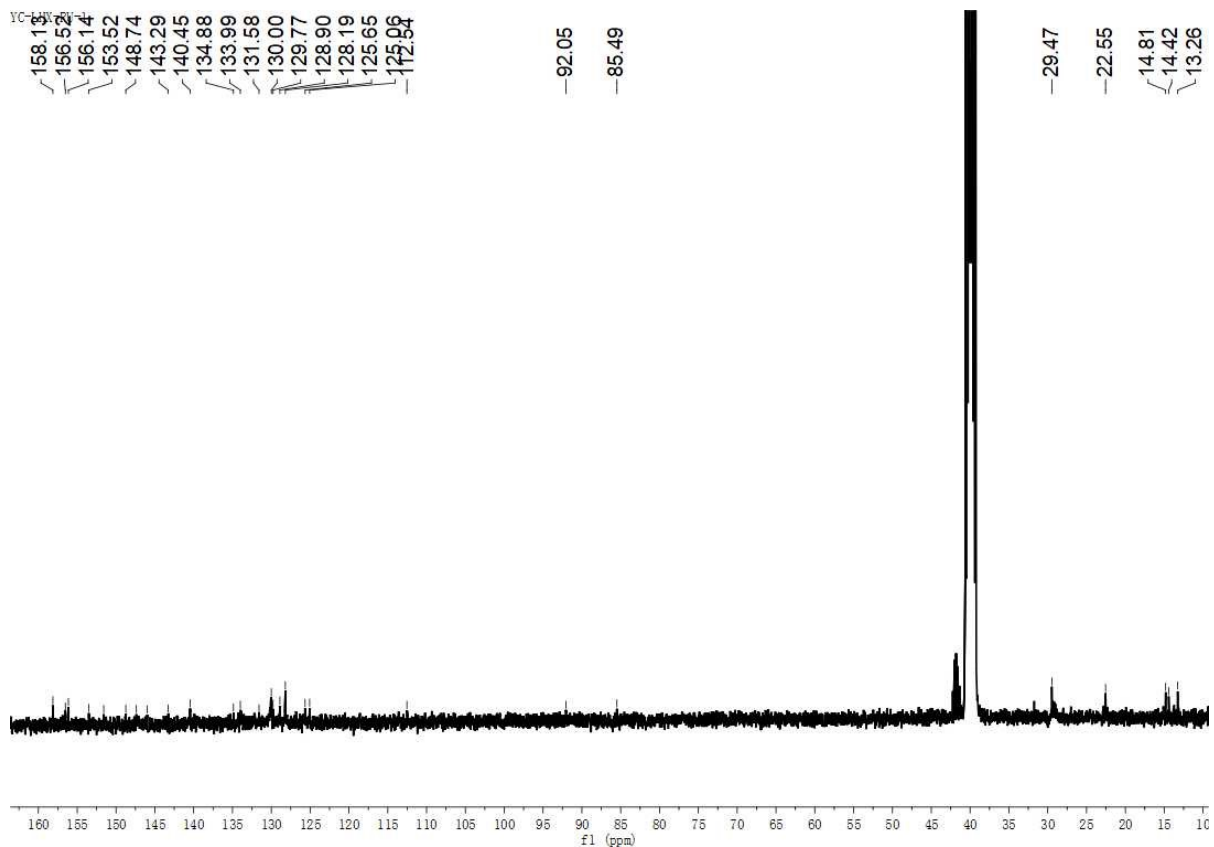

Figure S8.  $^{13}\text{C}$  NMR for **Ru-1** in  $\text{DMSO-}d_6$ ,  $20^\circ\text{C}$ .

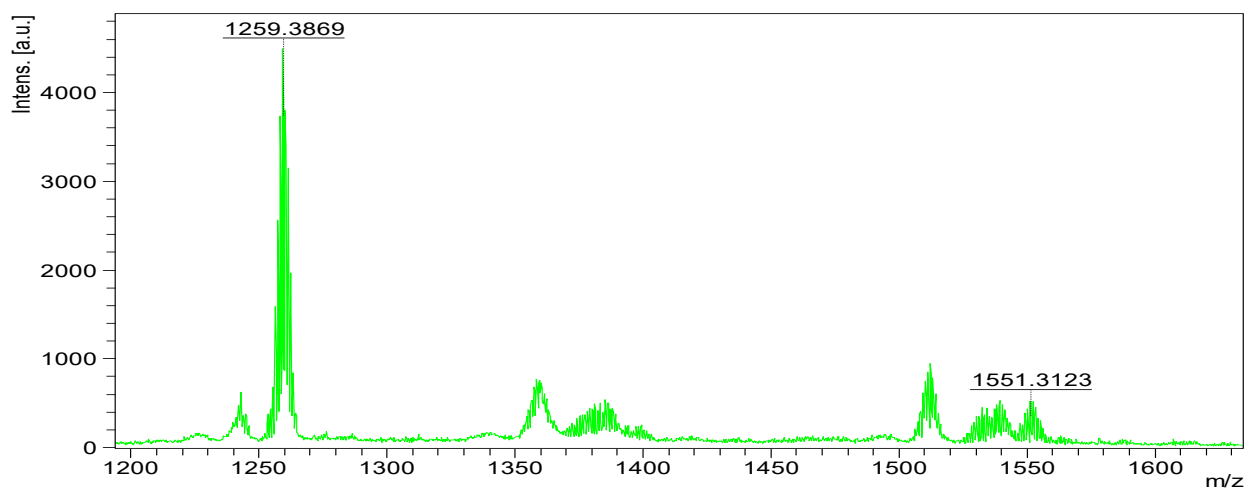

Figure S9. The MALDI-TOF (HRMS) spectrum of **Ru-1**.

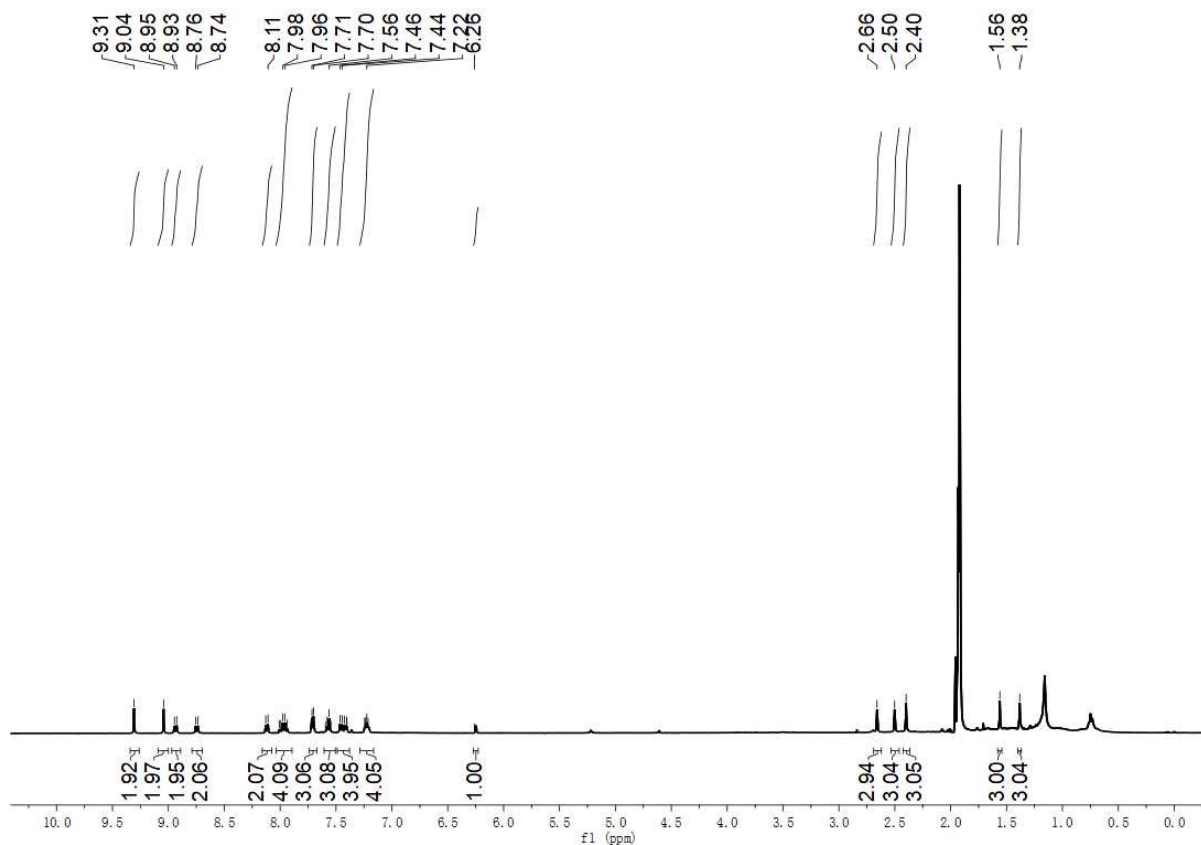

Figure S10.  $^1\text{H}$  NMR for **Ru-2** in acetone- $d_6$ , 20°C.

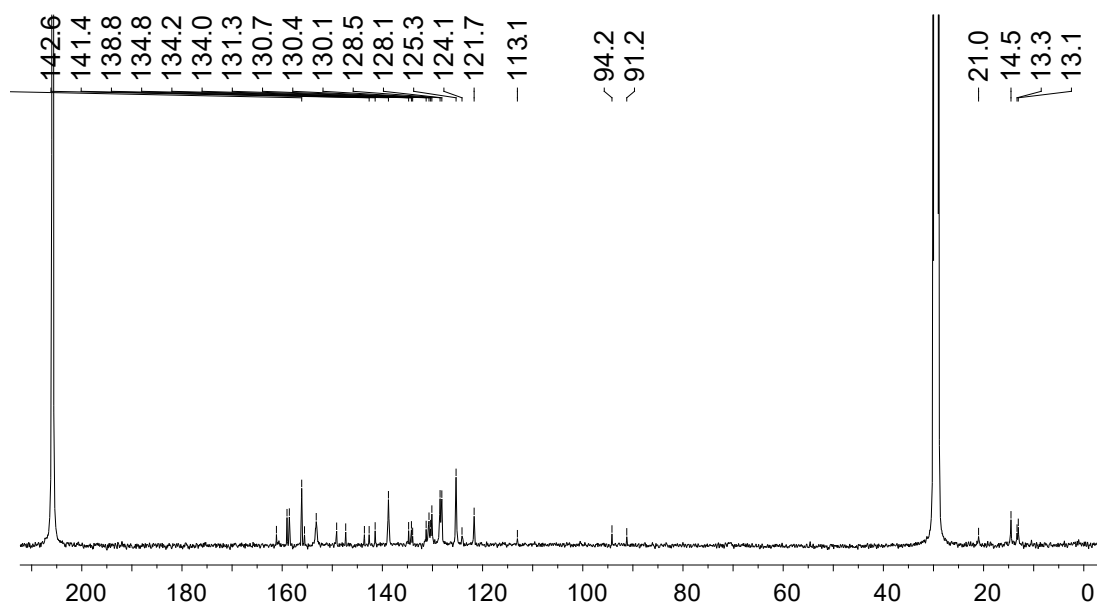

Figure S11.  $^{13}\text{C}$  NMR of **Ru-2** in acetone- $d_6$ .

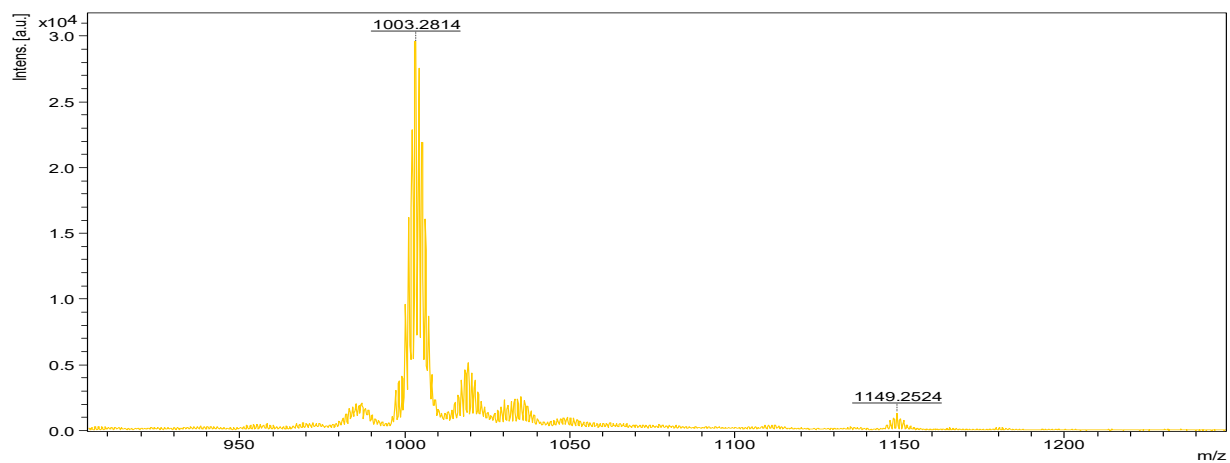

Figure S12. The MALDI-TOF (HRMS) spectrum of **Ru-2**.

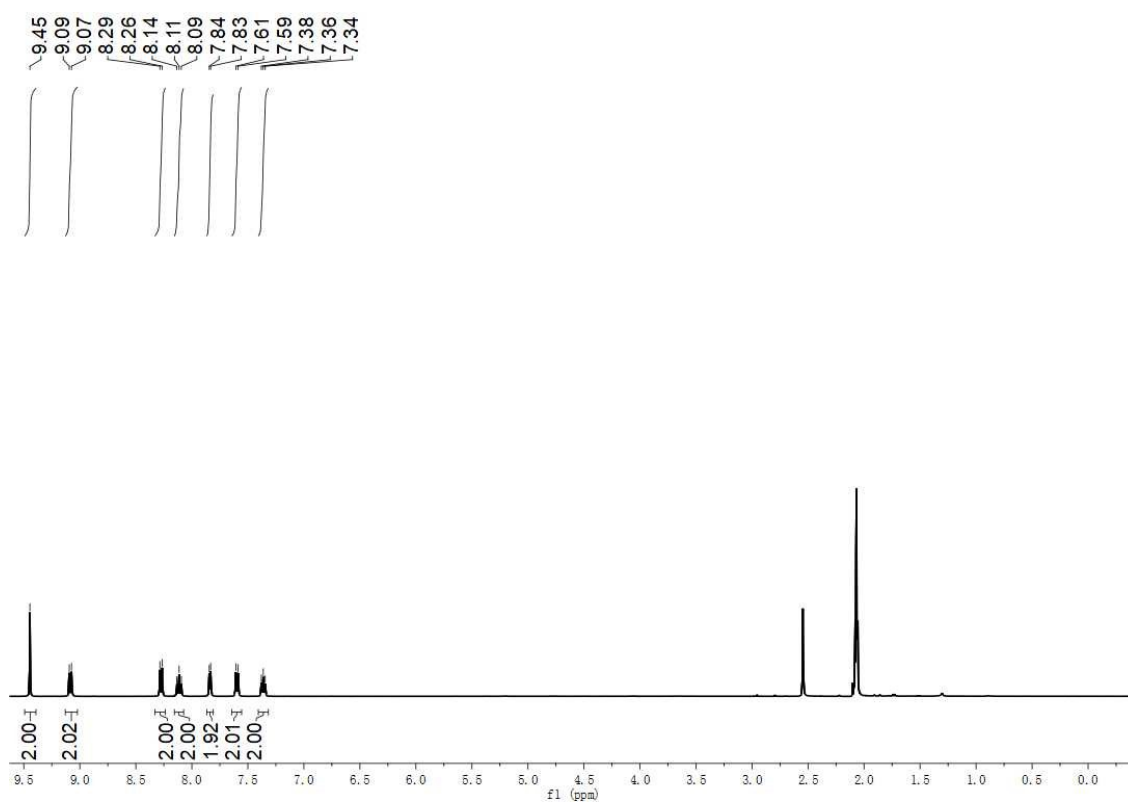

Figure S13. <sup>1</sup>H NMR for **Ru-3** in acetone-*d*<sub>6</sub>, 20°C.



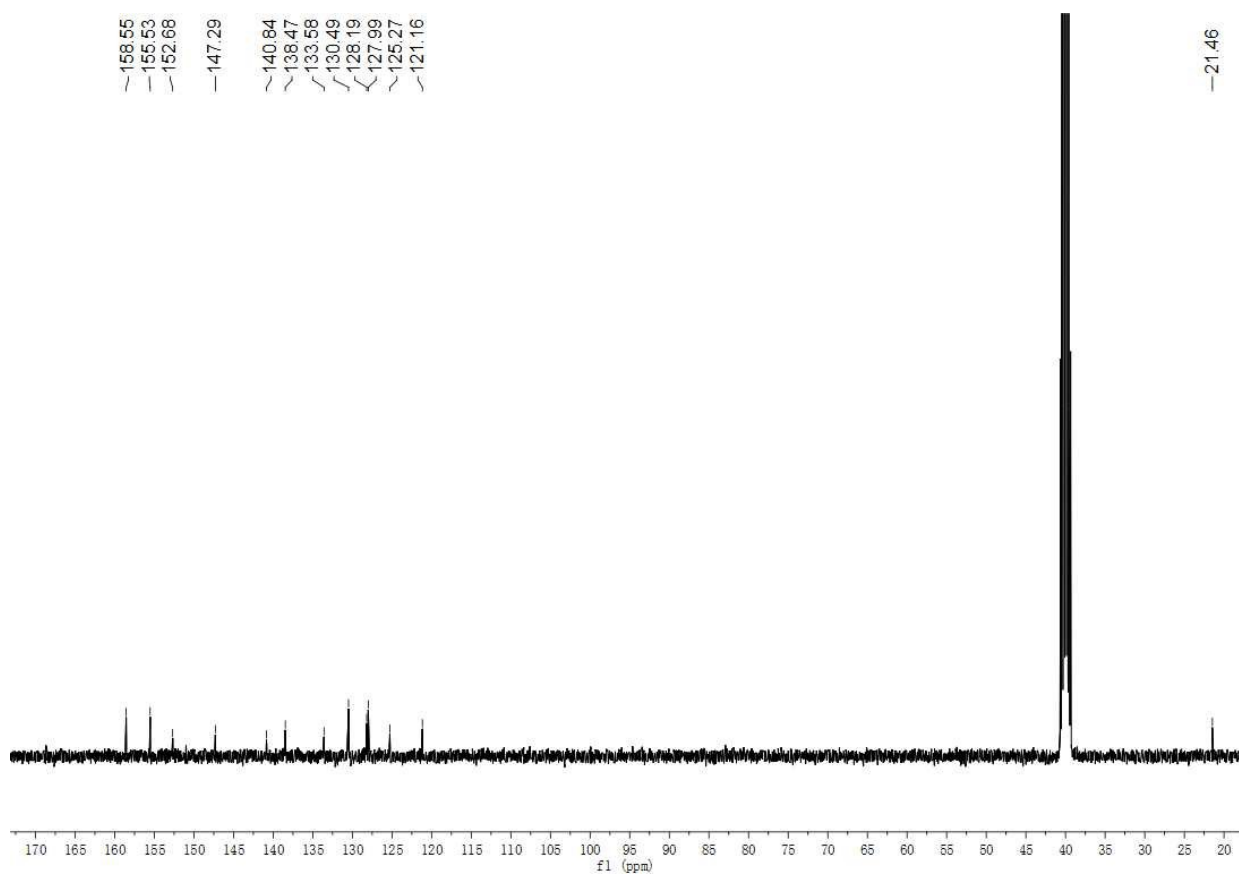

Figure S14.  $^{13}\text{C}$  NMR for **Ru-3** in  $\text{DMSO-}d_6$ ,  $20^\circ\text{C}$ .

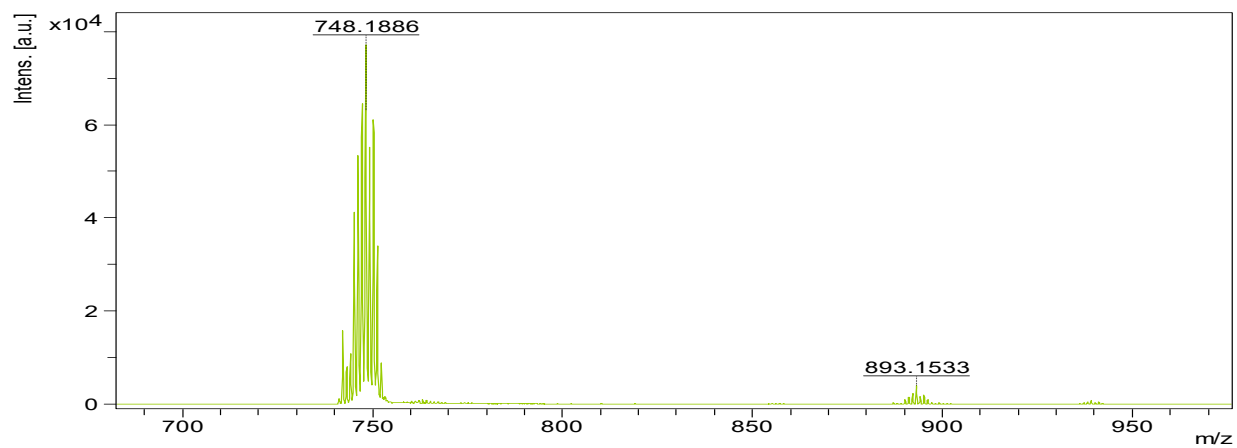

Figure S15. The MALDI-TOF (HRMS) spectrum of **Ru-3**.

### 3.0 Photophysical details

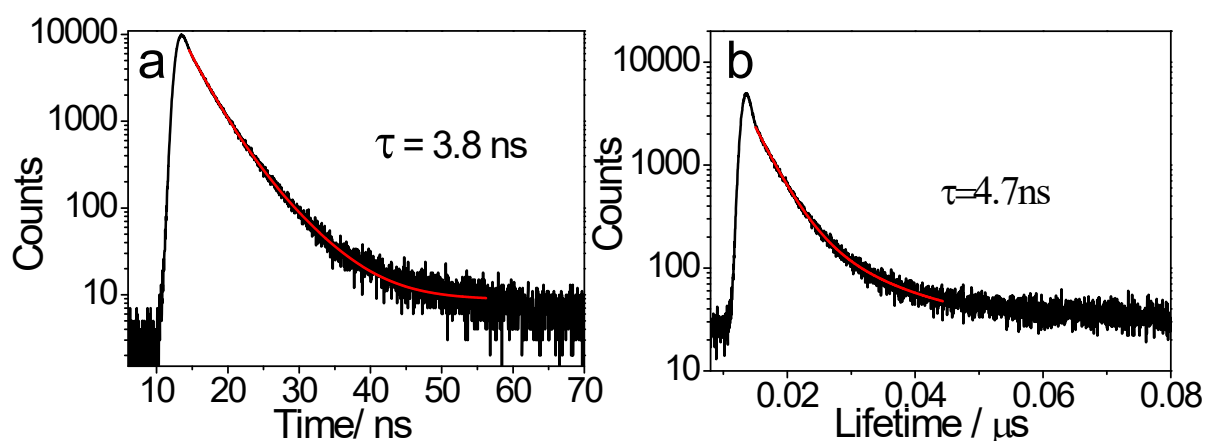

Figure S16. (a) The fluorescence decay spectra **Ru-1** was monitored at 550 nm, 1.0  $\mu$ M, MeCN, RT; (b) Emission decays of **Ru-2** monitored at 687 nm, 1.0  $\mu$ M, MeCN, RT.

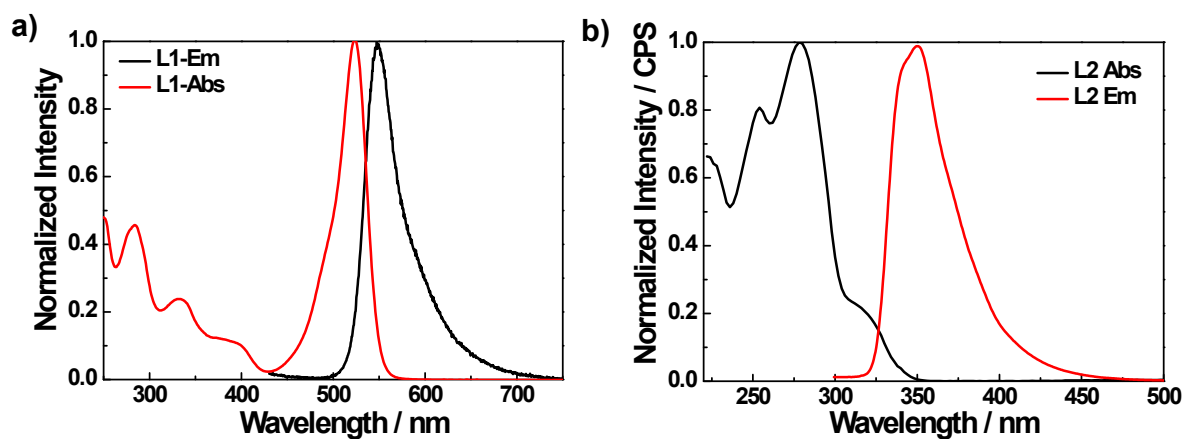

Figure S17. The UV-vis absorption and emission spectra of (a) **L1** and (b) **L2**,  $1 \times 10^{-5}$  M in MeCN, r.t.

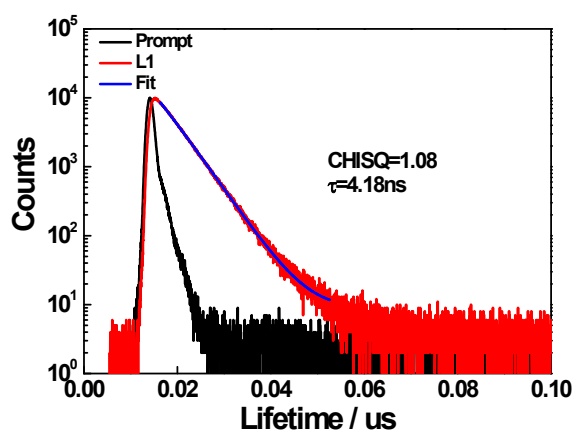

Figure S18. The fluorescence decay spectra **L1** was monitored at 477nm (excited with nanoled 388nm laser) in the MeCN. Experimental conditions:  $1 \times 10^{-6}$  mol/L, RT.

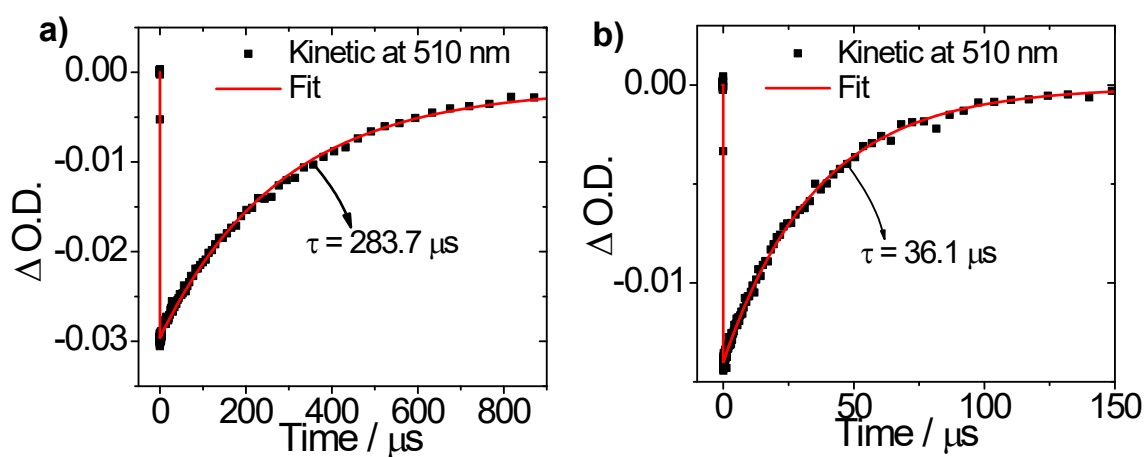

Figure S19. Nanosecond time-resolved transient decay traces of (a) **Ru-1** at 510 nm and (b) **Ru-2** at 510 nm.  $2 \times 10^{-5}$  M in deaerated MeCN, 20°C.

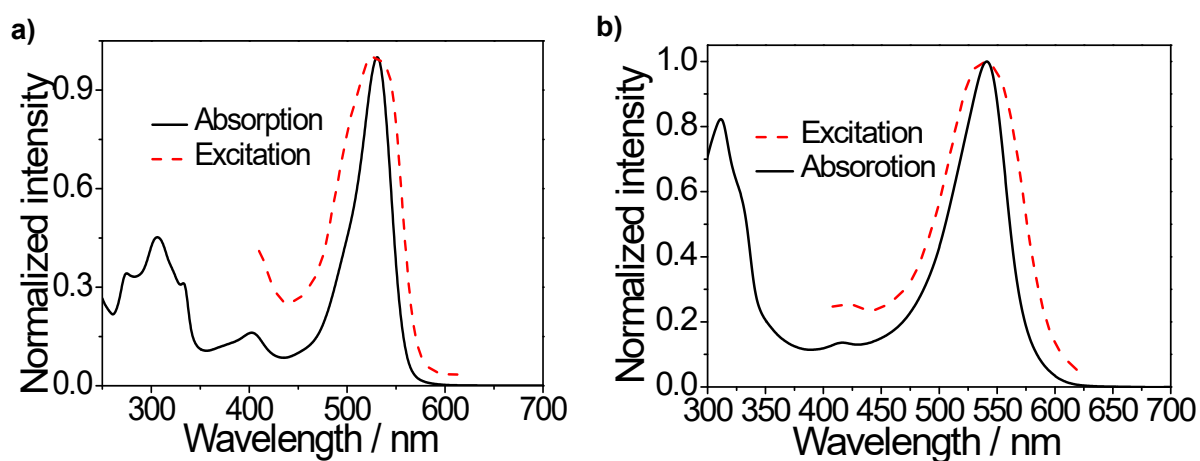

Figure S20. Comparison of the normalized UV-vis absorption and the excitation spectra of the complexes **Ru-1** (a), **Ru-2** (b),  $\lambda_{em} = 750$  nm,  $1 \times 10^{-5}$  mol/L, in MeCN solution, r.t.

#### 4.0 Upconversion details

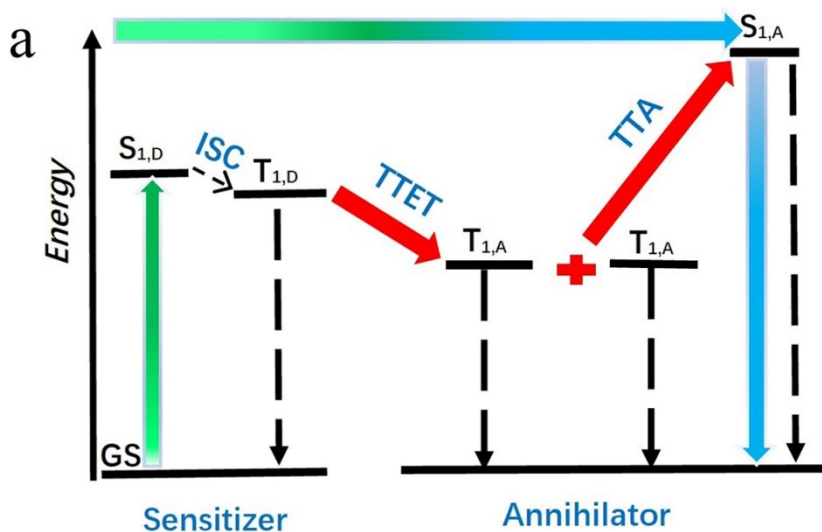

Figure S21. (a) Schematic energy-level illustration of the TTA-UC process. GS,  $S_{1,D}$  and  $T_{1,D}$  represent the ground state, singlet and triplet excited states of the energy donor (sensitizer), respectively.  $S_{1,A}$  and  $T_{1,A}$  represent singlet and triplet excited states of the energy acceptor. ISC, TTET, and TTA represent the process of intersystem crossing, triplet-triplet energy transfer, and triplet-triplet annihilation, respectively.

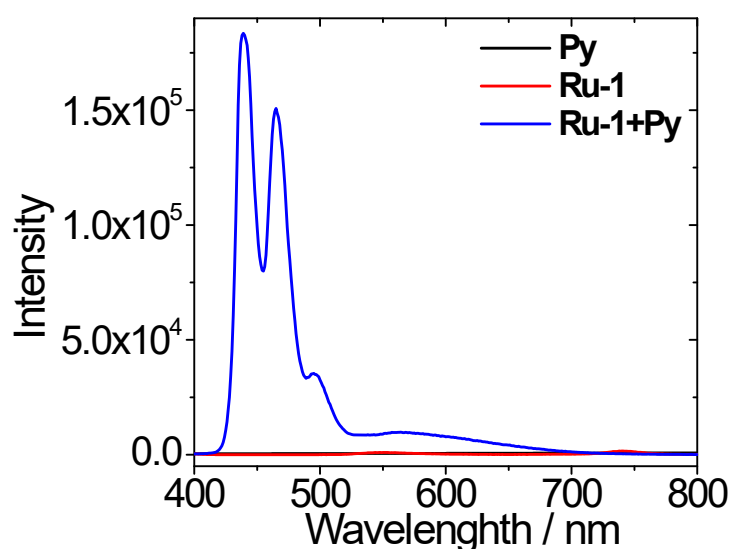

Figure S22. The emission spectra of **Ru-1**, **Py** and the mixture of **Ru-1/Py** in the deaerated MeCN, [**Ru-1**] = 1.0  $\mu$ M, [**Py**] = 3.3  $\mu$ M, power density = 343.9 mW/cm<sup>2</sup>, RT.

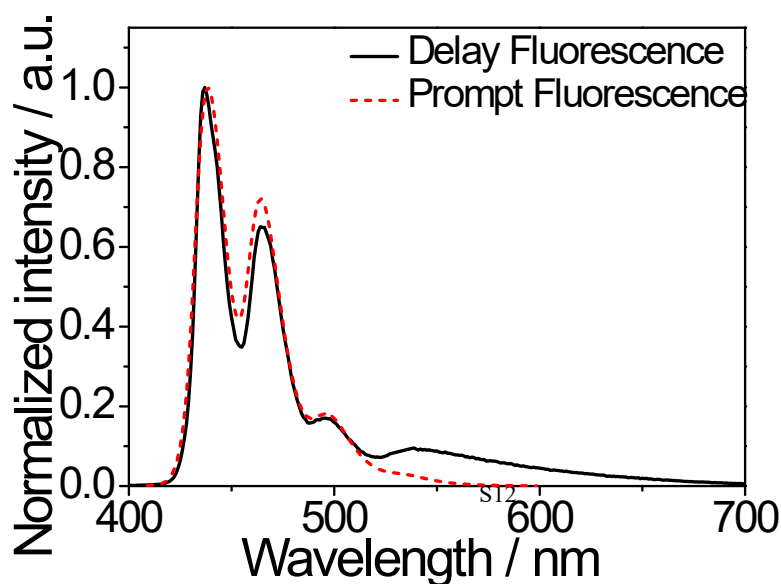

Figure S23. Normalized spectra of UC emission of **Ru-1** / **Py** system and prompt fluorescence of **Py** in MeCN,  $[\mathbf{Ru-1}] = 1.0 \mu\text{M}$ ,  $[\mathbf{Py}] = 3.3 \mu\text{M}$ , RT.

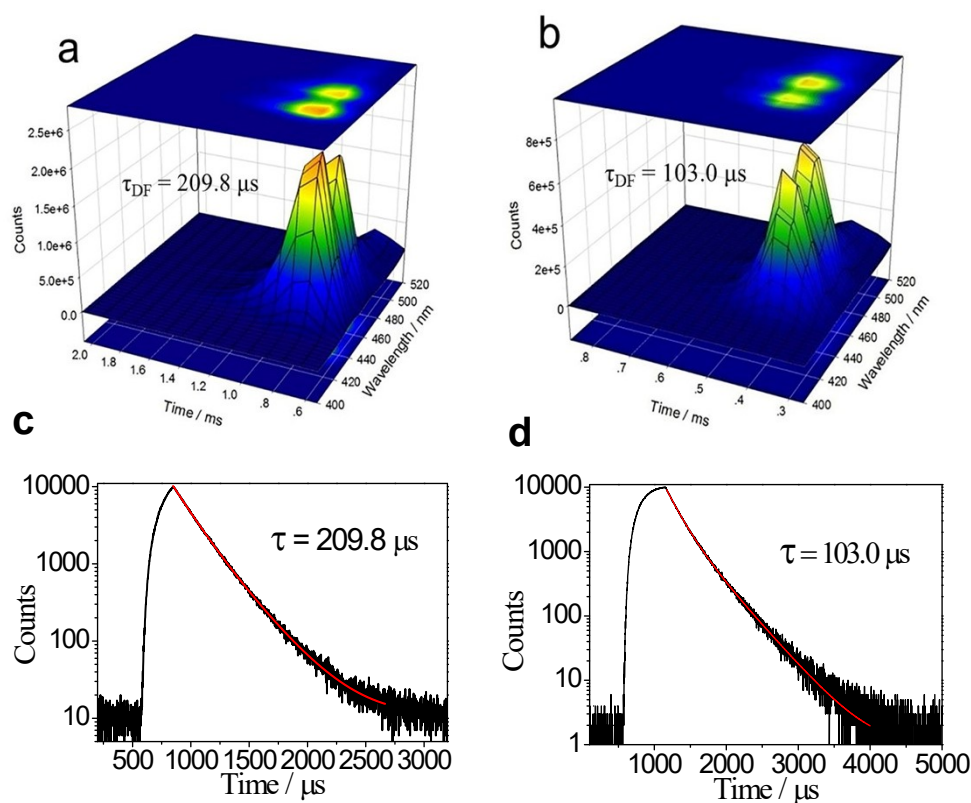

Figure S24. Time-resolved emission spectra (TRES) of the upconverted fluorescence of **Py** using (a) **Ru-1** as the triplet photosensitizer and (b) **Ru-2** as the triplet photosensitizer. Experimental conditions:  $[\mathbf{Ru-1}] = 10 \mu\text{M}$ ,  $[\mathbf{Ru-2}] = 10 \mu\text{M}$ ,  $[\mathbf{Py}] = 33 \mu\text{M}$ , in deaerated MeCN, RT; The TTA-UC decay spectra of (c) **Ru-1** / **Py** and (d) **Ru-2** / perylene,  $\lambda_{\text{em}} = 445 \text{ nm}$ .

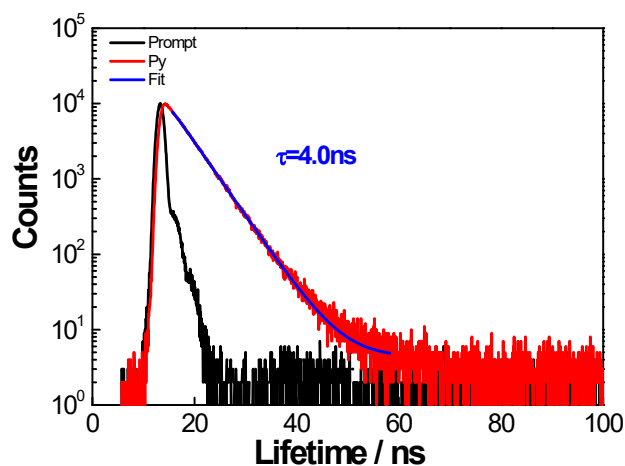

Figure S25. The fluorescence decay spectra **Py** was monitored at 450 nm (excited with nanoled 388nm laser) in the MeCN. Experimental conditions:  $1 \times 10^{-5}$  mol/L, RT.

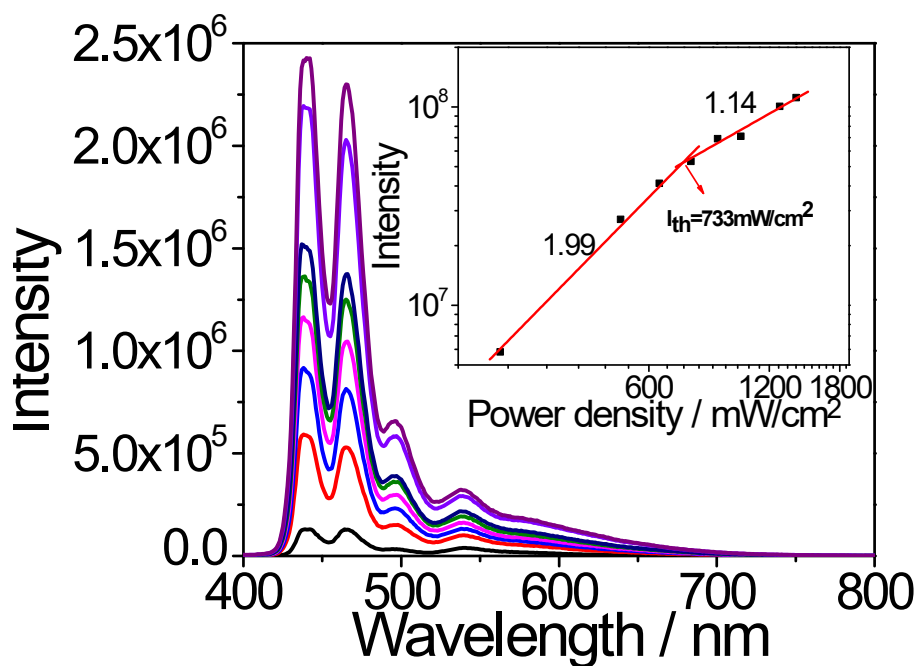

Figure S26. Excitation power dependency of the upconverted perylene emission with **Ru-2** as sensitizers,  $\lambda_{\text{ex}} = 532$  nm, MeCN. (Insert: the normalized integrated emission intensity plotted as a function of normalized incident light power). The minimal and the maximal excitation power densities are  $254.8 \text{ mW/cm}^2$  and  $1401.3 \text{ mW/cm}^2$ , respectively.  $[\text{Ru-2}] = 1.0 \text{ }\mu\text{M}$ ,  $[\text{Py}] = 3.3 \text{ }\mu\text{M}$ .

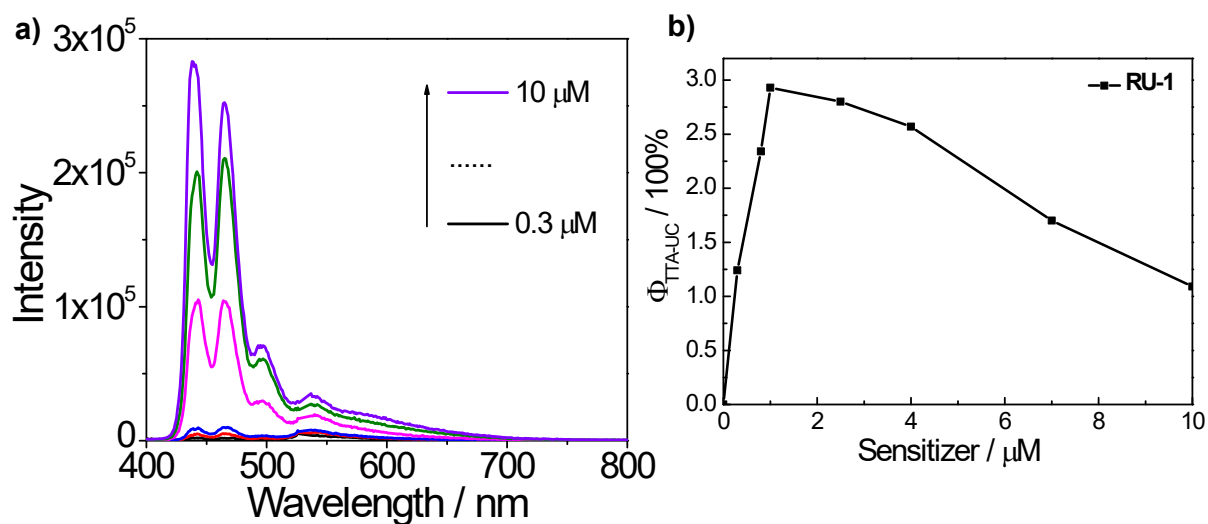

Figure S27. (a) Dependency of the UC emission upon the concentrations of sensitizer **Ru-1** in deaerated MeCN; (b) The upconverted quantum yield plotted as a function of the concentration of **Ru-1**. [**Py**] = 3.3  $\mu\text{M}$  in MeCN. power density =  $1273.9 \text{ mW} \cdot \text{cm}^{-2}$ ,  $\lambda_{\text{ex}} = 532 \text{ nm}$ .

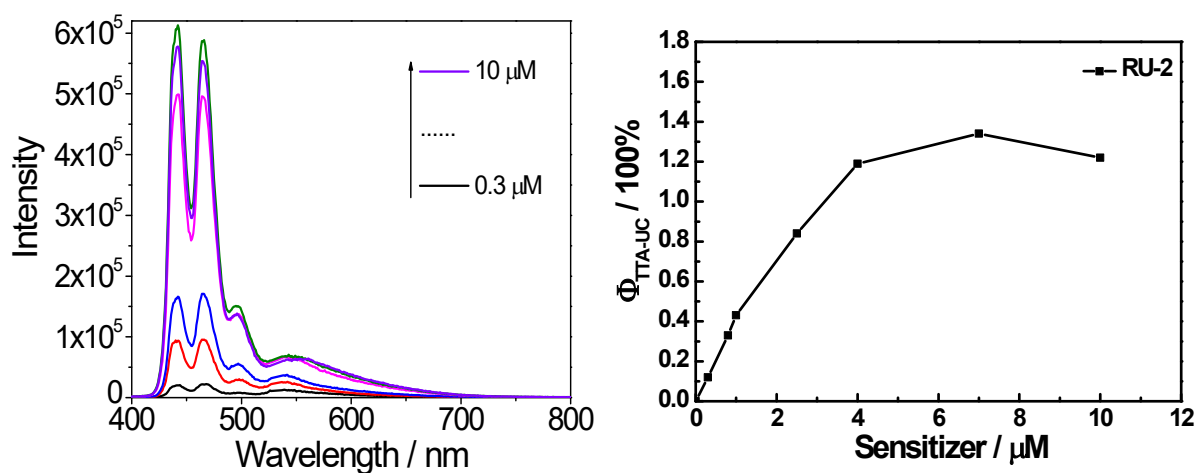

Figure S28. (a) Dependency of the UC emission upon the concentrations of sensitizer **Ru-2** in deaerated MeCN; (b) The upconverted quantum yield plotted as a function of the concentration of **Ru-2**. [**Py**] = 3.3  $\mu\text{M}$  in MeCN. power density =  $1273.9 \text{ mW} \cdot \text{cm}^{-2}$ ,  $\lambda_{\text{ex}} = 532 \text{ nm}$ .

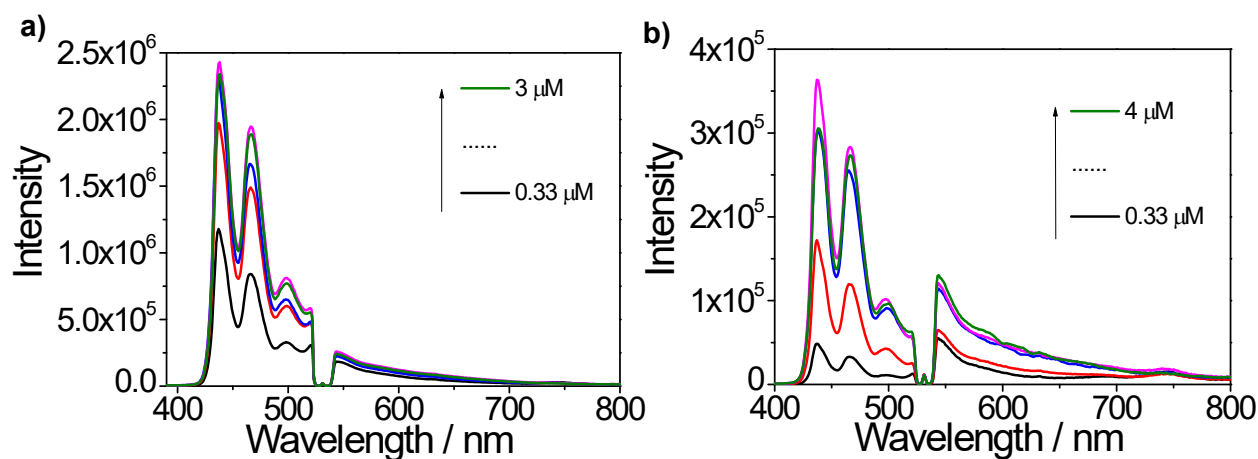

Figure S29. (a) Dependency of UC emission spectra upon the concentrations of acceptor **Py** with (a) **Ru-1** and (b) **Ru-2** as the sensitizers,  $\lambda_{\text{ex}} = 532$  nm,  $[\text{Ru-1}] = 1.0 \mu\text{M}$ ,  $[\text{Ru-2}] = 1.0 \mu\text{M}$  in deaerated MeCN, power density =  $1273.9 \text{ mW/cm}^2$ , RT.

Table S1. The quantum efficiency with different concentration of acceptors <sup>[a]</sup>

|                      | 0.33 $\mu\text{M}$ | 0.67 $\mu\text{M}$ | 1.0 $\mu\text{M}$ | 2.0 $\mu\text{M}$ | 3.0 $\mu\text{M}$ |
|----------------------|--------------------|--------------------|-------------------|-------------------|-------------------|
| $\Phi_{\text{Ru-1}}$ | 1.29%              | 2.28%              | 2.56%             | 2.93%             | 2.83%             |
| $\Phi_{\text{Ru-2}}$ | 0.045%             | 0.18%              | 0.38%             | 0.43%             | 0.4%              |

[a] Excited with 532 nm laser, with the prompt fluorescence of **I-BDP-I** as the standard ( $\Phi = 2.7\%$  in MeCN).

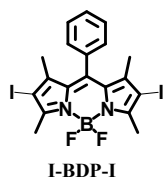

Figure S30. The chemical structure of **I-BDP-I**

Table S2. Triplet excited state lifetimes ( $\tau_T$ ), Stern-Volmer quenching constant ( $K_{\text{SV}}$ ) and bimolecular quenching constants ( $k_q$ ) of **Ru-1**, **Ru-2** and **Ru-3** as the sensitizers. <sup>[a]</sup>

|             | $K_{\text{sv}} (10^3 \text{ M}^{-1})$ | $k_q (10^9 \text{ M}^{-1}\text{s}^{-1})$ | $\tau_{\text{DF}} / \mu\text{s}$ | $\Phi_{\text{UC}} (\%)^{[b]}$ | $\eta^{[c]} / 10^3 \text{ M}^{-1}\text{cm}^{-1}$ |
|-------------|---------------------------------------|------------------------------------------|----------------------------------|-------------------------------|--------------------------------------------------|
| <b>Ru-1</b> | 3994.2                                | 10.9                                     | 209.8                            | 2.93                          | 3.47                                             |
| <b>Ru-2</b> | 683.4                                 | 12.7                                     | 103.0                            | 0.43                          | 0.22                                             |

[a] Excited with 532 nm laser. [b] results with  $[\text{sensitizer}] = 1.0 \mu\text{M}$ ,  $[\text{Py}] = 3.3 \mu\text{M}$ . [c] apparent brightness.  $\eta = \varepsilon \times \Phi_{\text{UC}}$ .
